# Supplementary material for: Inflammation-Related Biomarkers Are Associated with Heart Failure Severity and Poor Clinical Outcomes in Patients with Non-Ischemic Dilated Cardiomyopathy
Source: MDPI journal article supplement (doi:10.3390/life11101006), 2021-09-24
Supplement: s1 [file s1]

**Table S1.** Cut-off values identified by ROC analysis of inflammation-related biomarkers for predicting adverse cardiac events.

|                         | Cut-off | Specificity, % | Sensitivity, % | AUC (95% CI)     |
|-------------------------|---------|----------------|----------------|------------------|
| WBC $\times 10^9/L$     | 10.66   | 32             | 88             | 0.56 (0.39–0.72) |
| hs-CRP, mg/L            | 4.62    | 65             | 65             | 0.61 (0.44–0.77) |
| IL-6, pg/mL             | 4.53    | 83             | 64             | 0.77 (0.64–0.89) |
| TNF- $\alpha$ , pg/mL   | 7.81    | 53             | 80             | 0.65 (0.50–0.79) |
| Adiponectin, $\mu g/mL$ | 17.14   | 73             | 60             | 0.70 (0.55–0.73) |
| suPAR, ng/mg of protein | 0.85    | 80             | 35             | 0.51 (0.34–0.69) |
| CD3+, cells/ $mm^2$     | 13      | 75             | 41             | 0.59 (0.43–0.74) |
| CD45ro+, cells/ $mm^2$  | 11.5    | 89             | 26             | 0.53 (0.37–0.68) |
| CD68+, cells/ $mm^2$    | 9       | 96             | 11             | 0.51 (0.36–0.66) |
| CD54+, cells/ $mm^2$    | 2.5     | 93             | 7              | 0.43 (0.29–0.56) |
| CD4+, cells/ $mm^2$     | 3.5     | 61             | 56             | 0.53 (0.37–0.69) |
| HLA-DR+, cells/ $mm^2$  | 5.5     | 68             | 41             | 0.53 (0.38–0.68) |

AUC–area under the curve, hs-CRP–high-sensitivity C-reactive protein, CI–confidence interval, IL-6–interleukin 6, suPAR–soluble urokinase-type plasminogen activator receptor, TNF- $\alpha$ –tumor necrosis factor  $\alpha$ , WBC–white blood cell.
